# Supplementary material
Source: PubMed Central journal article supplement (PMC5707627)
Supplement: ma7b01832_si_001.pdf [file ma7b01832_si_001.pdf]

## *Supporting Information for*

### **Strategies to Increase the Thermal Stability of Truly Biomimetic Hydrogels: Combining Hydrophobicity and Directed Hydrogen Bonding**

Hongbo Yuan<sup>†,§</sup>, Jialiang Xu<sup>\*,‡,§</sup>, Eliane P. van Dam<sup>&</sup>, Giulia Giubertoni<sup>&</sup>, Yves L. A. Rezus<sup>&</sup>, Roel Hammink<sup>§</sup>, Huib J. Bakker<sup>&</sup>, Yong Zhan<sup>†</sup>, Alan E. Rowan<sup>\*,§,||</sup>, Chengfen Xing<sup>\*,†</sup> and Paul H. J. Kouwer<sup>\*,§</sup>

<sup>†</sup>School of Materials Science and Engineering, Hebei University of Technology, Tianjin 300401, P.R. China

<sup>‡</sup>School of Chemical Engineering and Technology, Tianjin University, Yaguan Road 135, 300350, Tianjin, P.R. China

<sup>§</sup>Institute for Molecules and Materials (IMM), Radboud University, Heyendaalseweg 135, 6525AJ Nijmegen, The Netherlands

<sup>&</sup>AMOLF, Science Park 104, 1098 XG Amsterdam, The Netherlands

<sup>||</sup>Australian Institute for Bioengineering and Nanotechnology, The University of Queensland, Brisbane, QLD 4072, Australia

\*Email: jialiang.xu@tju.edu.cn; xingc@hebut.edu.cn; alan.rowan@uq.edu.au; p.kouwer@science.ru.nl

### **Table of Contents**

|    |                                                                               |    |
|----|-------------------------------------------------------------------------------|----|
| a. | <sup>1</sup> H, <sup>13</sup> C NMR spectra of 3EG-L-Ala-D-Ala-L-Ala-Boc..... | S2 |
| b. | <sup>1</sup> H, <sup>13</sup> C NMR spectra of 3EG-L-Ala-D-Ala-L-Ala-For..... | S3 |
| c. | <sup>1</sup> H, <sup>13</sup> C NMR spectra of monomer .....                  | S4 |
| d. | AFM images of polymer.....                                                    | S5 |
| e. | Frequency sweeps of TriPIC gel .....                                          | S5 |
| f. | Reversibility of TriPIC gel.....                                              | S5 |
| g. | Mechanical properties of TriPIC gels with polymer length.....                 | S6 |
| h. | Mechanical properties of TriPIC gels with salt.....                           | S6 |
| i. | Deconvoluted components of FTIR at each temperature .....                     | S7 |
| j. | FTIR spectra of the TriPIC polymer at 20 °C .....                             | S8 |
| k. | FTIR spectra of the TriPIC monomer with temperature .....                     | S8 |
| l. | UV-vis spectra of TriPIC polymer with temperature.....                        | S8 |

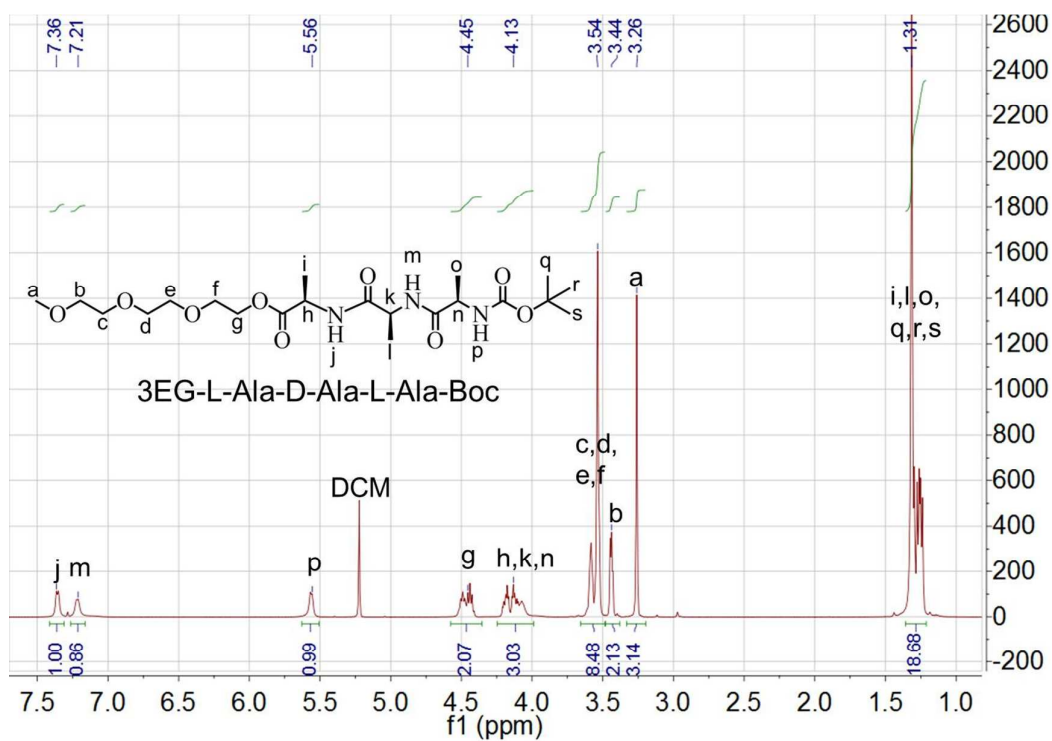

**Figure S1.**  $^1\text{H}$  NMR spectra of 3EG-L-Ala-D-Ala-L-Ala-Boc.

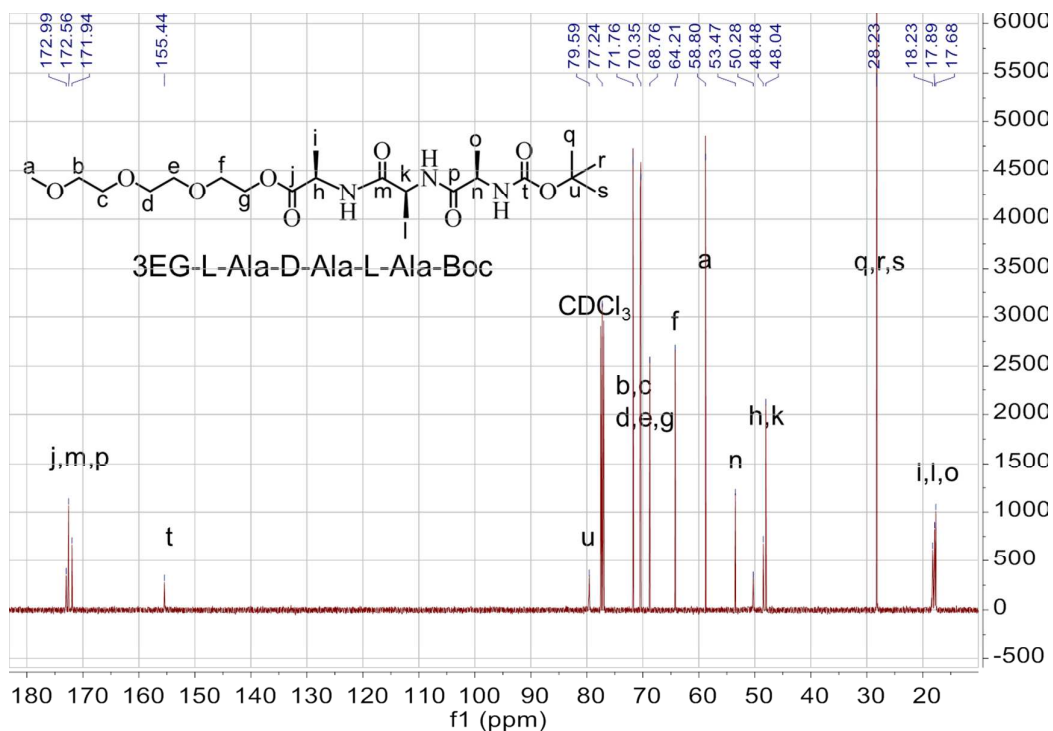

**Figure S2.**  $^{13}\text{C}$  NMR spectra of 3EG-L-Ala-D-Ala-L-Ala-Boc.

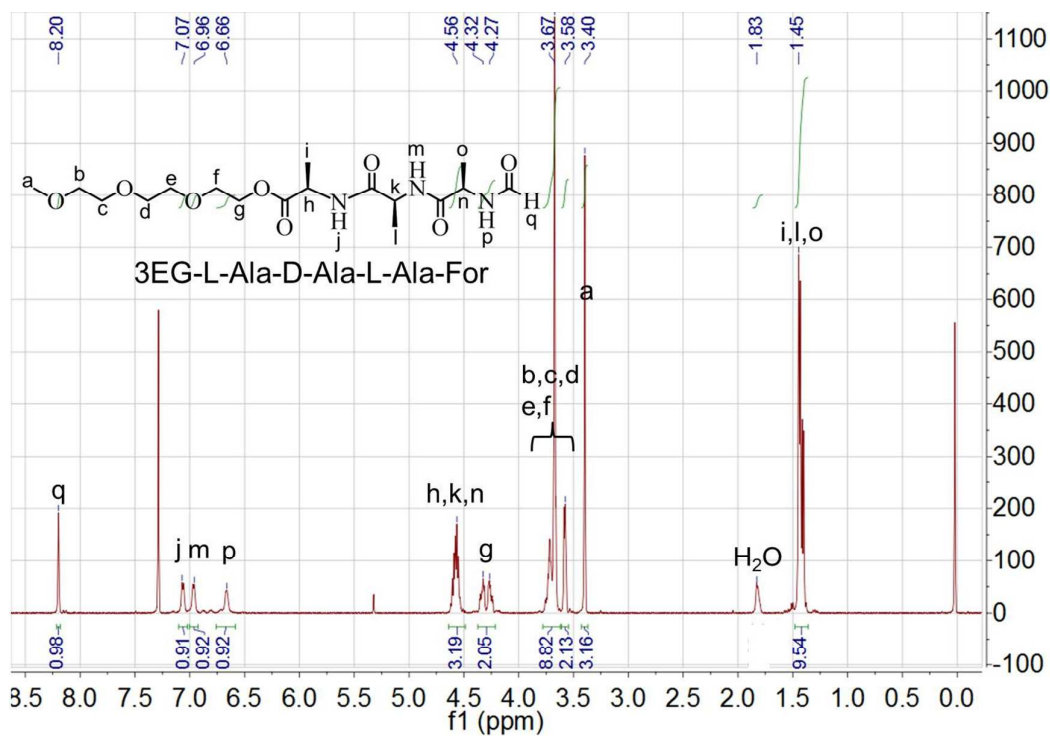

**Figure S3.** <sup>1</sup>H NMR spectra of 3EG-L-Ala-D-Ala-L-Ala-For.

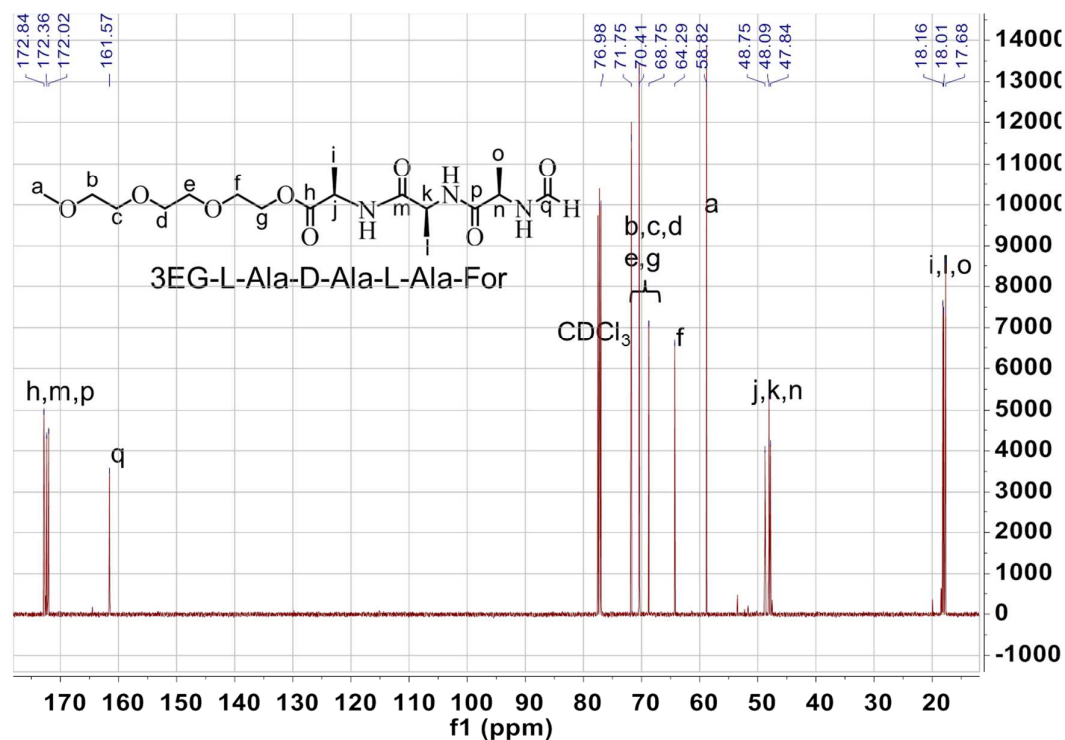

**Figure S4.** <sup>13</sup>C NMR spectra of 3EG-L-Ala-D-Ala-L-Ala-For.

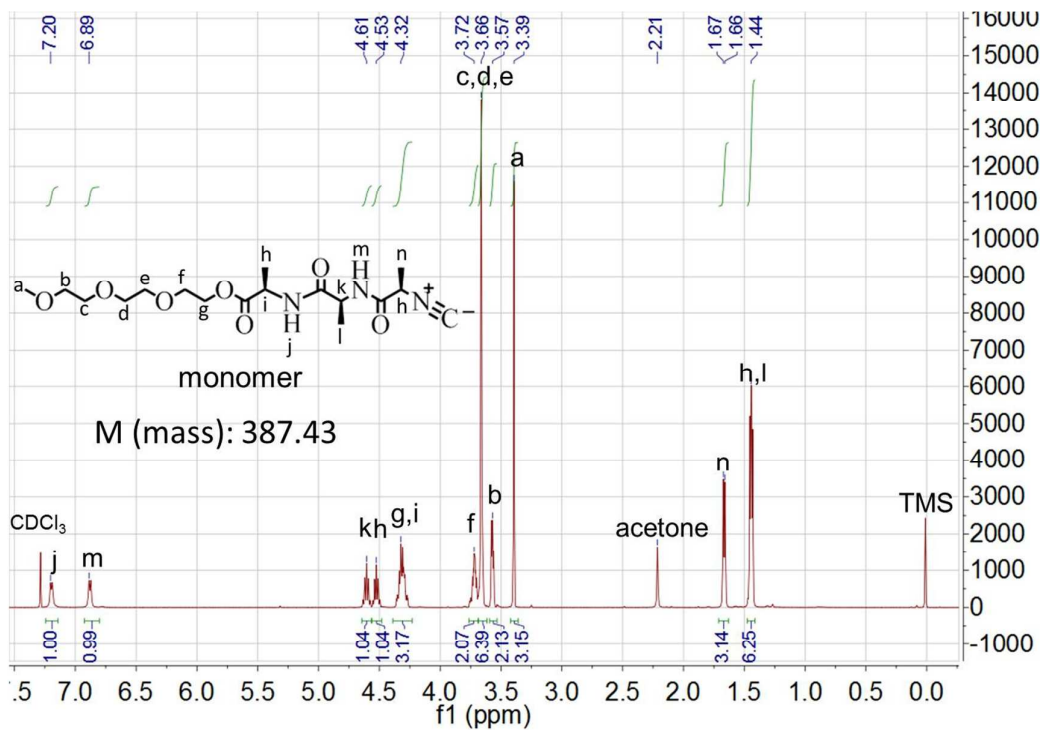

Figure S5. <sup>1</sup>H NMR spectra of the monomer.

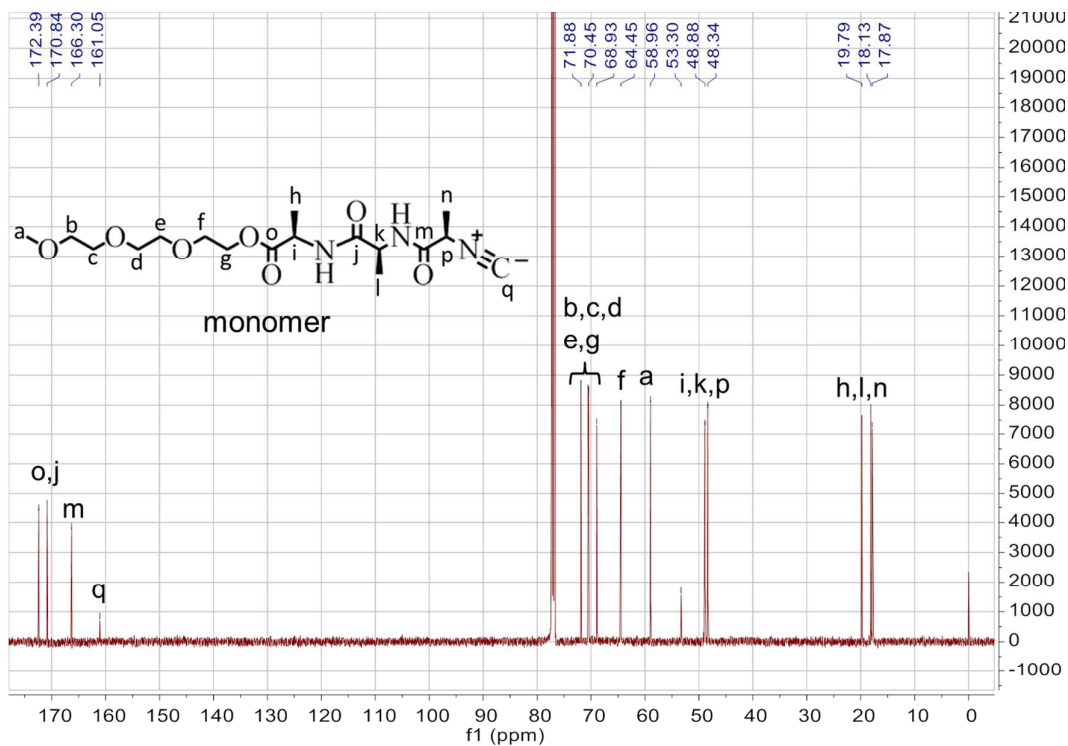

Figure S6. <sup>13</sup>C NMR spectra of the monomer.

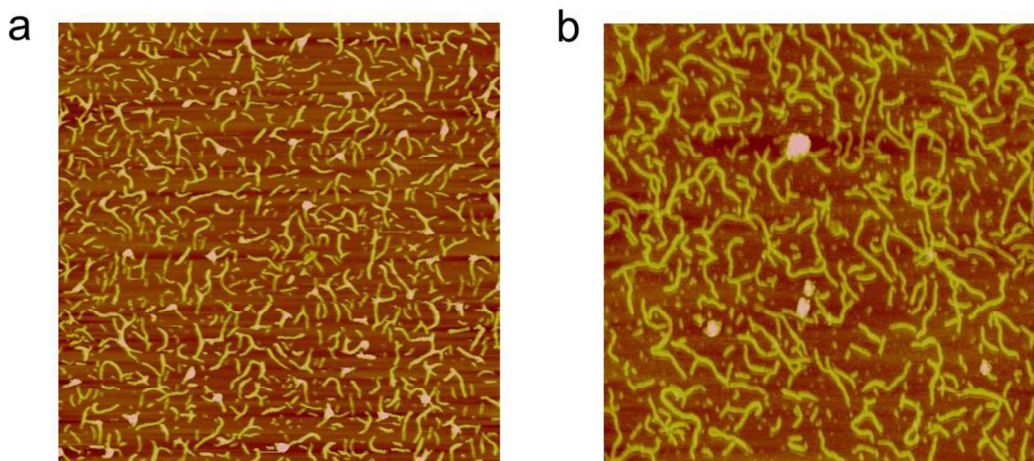

**Figure S7.** The representative AFM images of polymer TriPIC-a (a) and TriPIC-f (b).

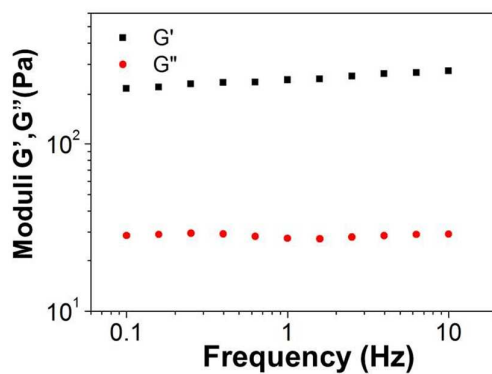

**Figure S8.** Frequency sweeps of TriPIC-f gel ( $2.0 \text{ g L}^{-1}$ ) in the linear viscoelastic regime at  $80 \text{ }^\circ\text{C}$ .

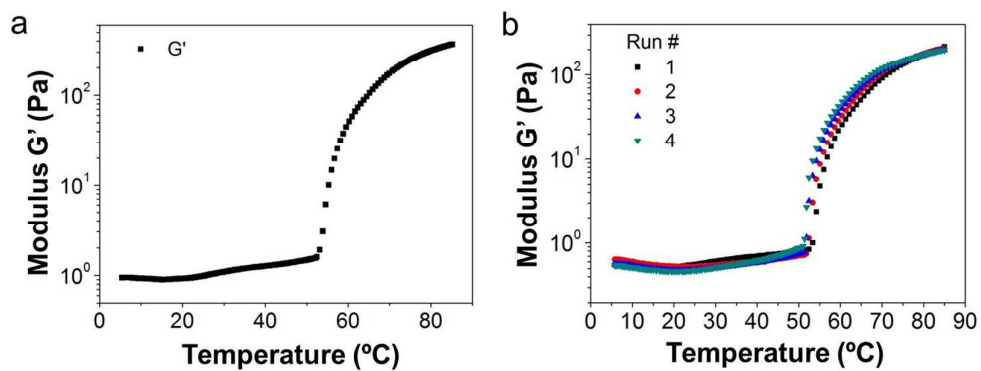

**Figure S9.** (a) Modulus  $G'$  of TriPIC-f as a function of temperature after the 10 h time sweep performed at  $80 \text{ }^\circ\text{C}$ . (b) Storage modulus  $G'$  of TriPIC-f as a function of temperature for 4 sequential heating and cooling runs,  $c = 2.0 \text{ g L}^{-1}$ .

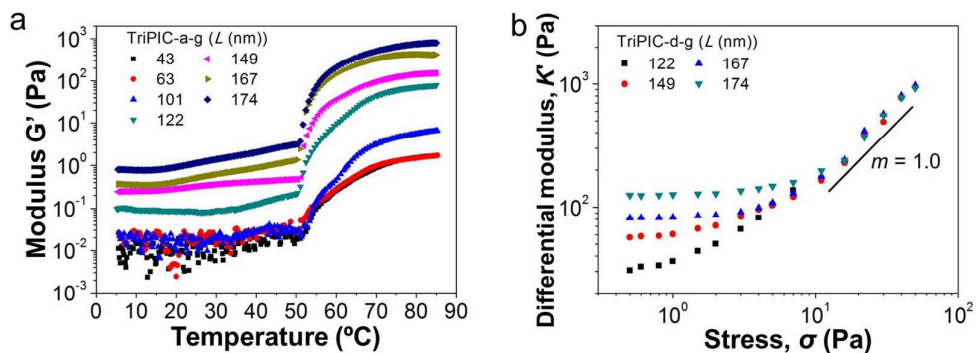

**Figure S10.** (a) Temperature ramps of the storage modulus  $G'$  for different length ( $L$ ) polymers. (b) Differential modulus  $K'$  against stress for different length ( $L$ ) polymers at 60  $^{\circ}\text{C}$ ,  $c = 2.0 \text{ g L}^{-1}$ .

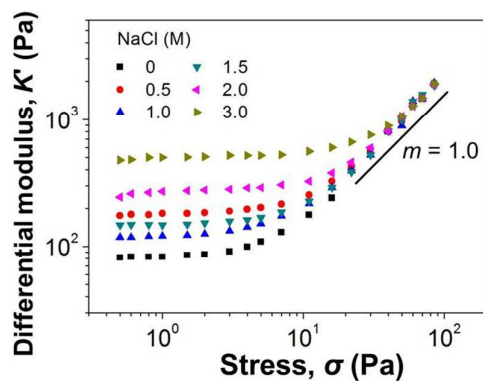

**Figure S11.** The differential modulus  $K'$  as a function of the applied stress for TriPIC-f with different concentrations of NaCl at 60  $^{\circ}\text{C}$ .

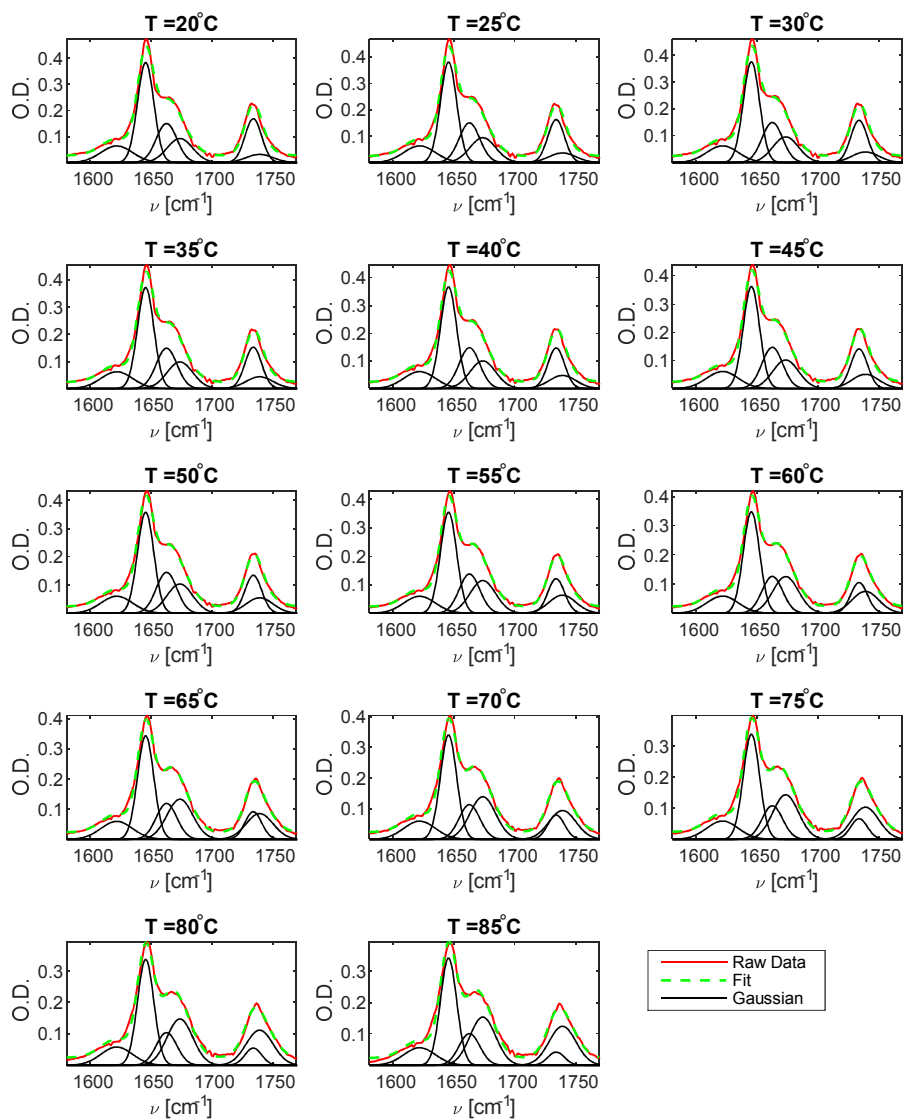

**Figure S12.** The best-fitted FTIR spectra and the deconvoluted components with 6 Gaussian-curves at 1622, 1646, 1661, 1674, 1734 and 1739  $\text{cm}^{-1}$  in the 1550–1780  $\text{cm}^{-1}$  region for TriPIC polymers at each temperature.



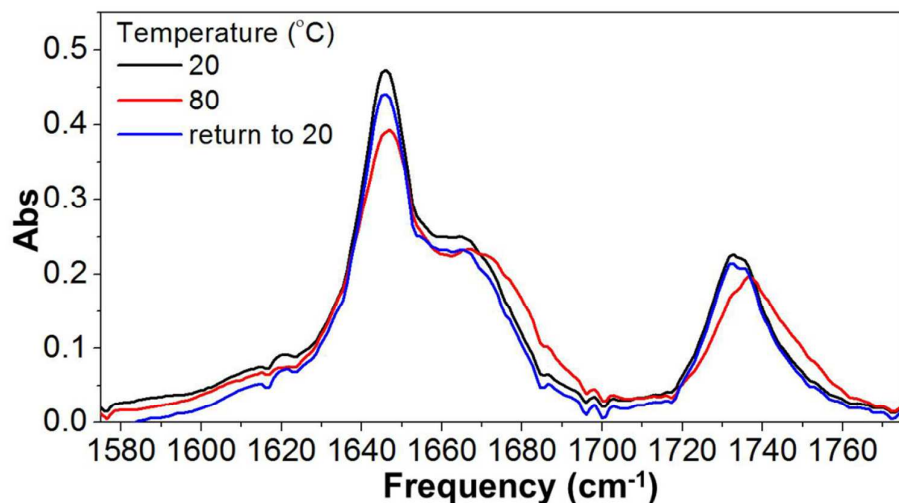

**Figure S13.** FTIR spectra of the TriPIC polymer ( $17.0 \text{ g L}^{-1}$  in  $\text{D}_2\text{O}$ ) in the amide I and ester regions at  $20 \text{ }^\circ\text{C}$  cooling down from  $80 \text{ }^\circ\text{C}$ .

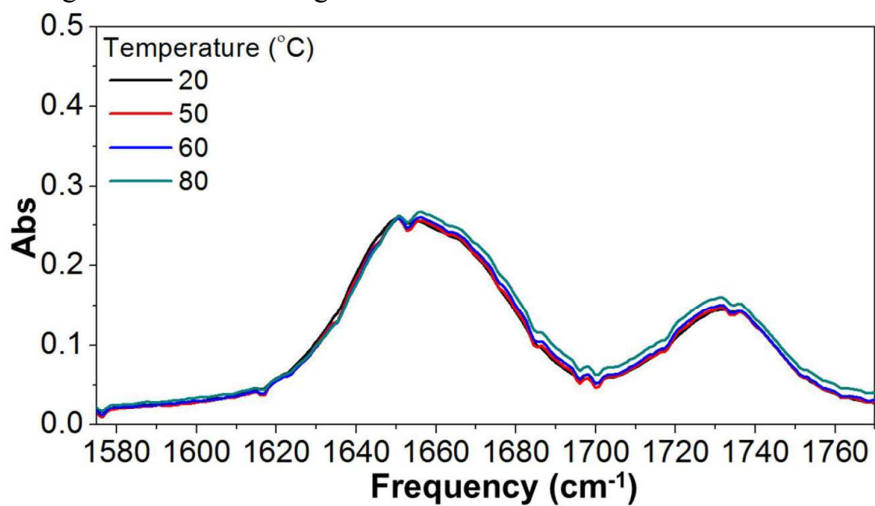

**Figure S14.** FTIR spectra of the TriPIC monomer ( $17.0 \text{ g L}^{-1}$  in  $\text{D}_2\text{O}$ ) in the amide I and ester regions as a function of temperature.

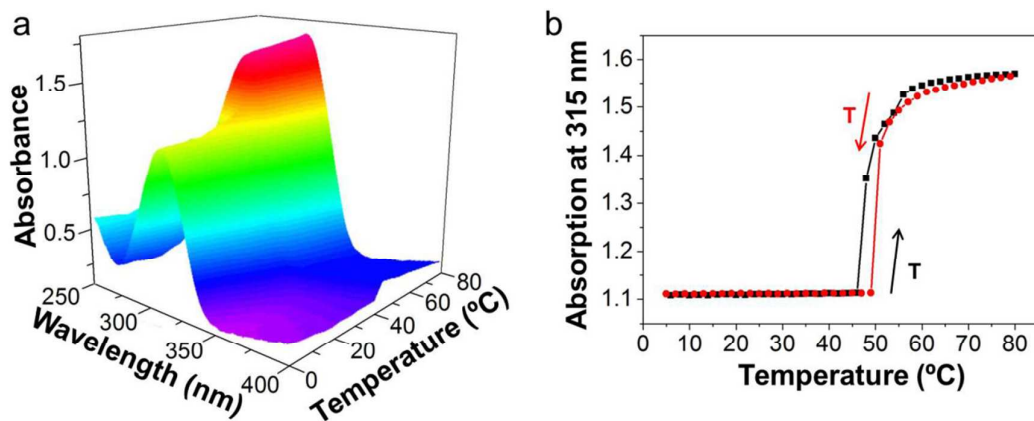

**Figure S15.** (a) UV-vis spectra of TriPIC as a function of temperature. (d) Evaluation of the absorption signal at  $\lambda = 315 \text{ nm}$  of TriPIC with temperature. Measurements were performed in water,  $c = 0.5 \text{ g L}^{-1}$ .
